# Supplementary material for: A Comprehensive Evaluation of Sdox, a Promising H2S-Releasing Doxorubicin for the Treatment of Chemoresistant Tumors
Source: Frontiers journal article supplement (doi:10.3389/fphar.2022.831791), 2022-03-07
Supplement: Table_3.pdf [file Table_3.pdf]

**Table S3. Structures of Dox metabolites predicted by the knowledge-based expert system Meteor Nexus (v. 3.1.0, Meteor KB 2018 1.0.0, Lhasa Ltd., <https://www.lhasalimited.org/>) with the minimal level of likelihood "plausible". The numbers of metabolites are listed below the structures (see also Table S1); 0 codes for metabolites that appear in the metabolic tree of Dox only and 1 codes for metabolites that appear in the metabolic trees of both, Dox and Sdox (see Table S5).**

**Enzyme: ADH**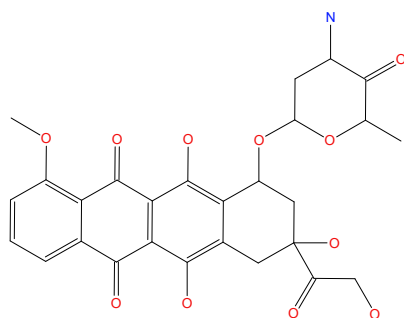

M1

1

**Enzyme: CYP450**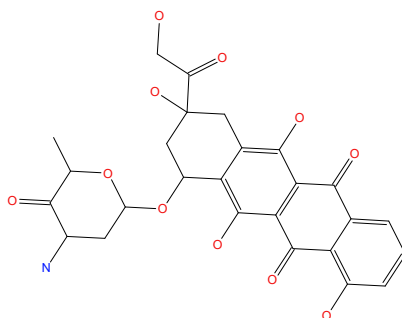

M15

1

**Enzyme: ADH**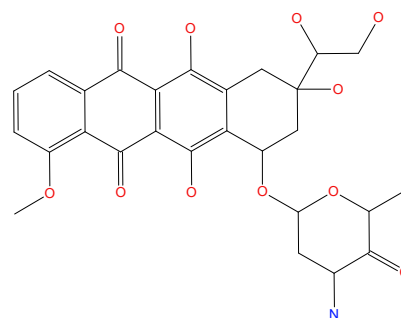

M16

1

**Enzyme: ADH**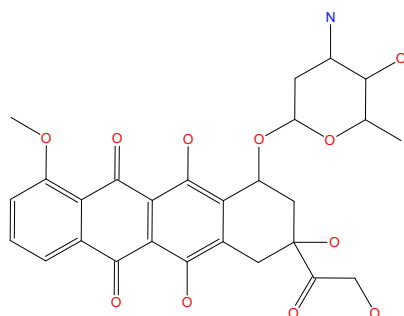

Dox

1

**Enzyme: ADH**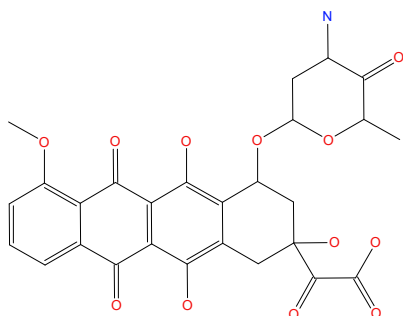

M17

1

**Enzyme: ADH**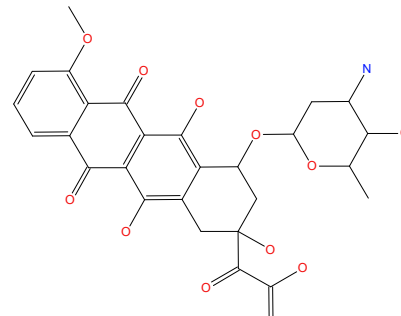

M8

1

**Enzyme: CYP450**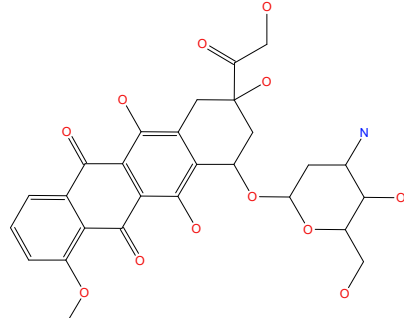

M2

1

**Enzyme: ADH**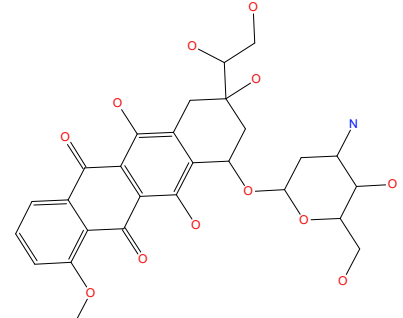

M24

1

**Enzyme: ADH**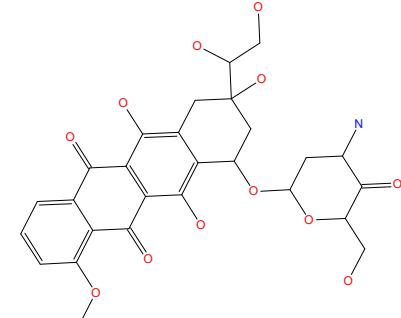

M61

0

**Enzyme: CYP450**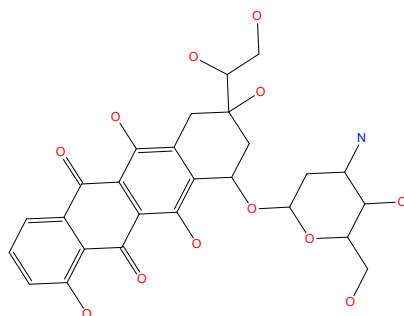

M78

0

**Enzyme: ADH**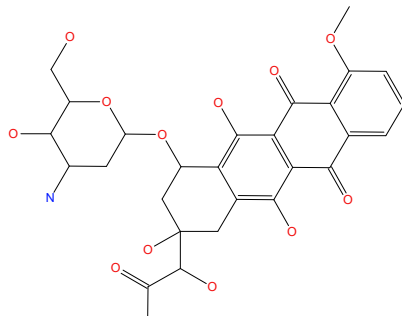

M79

0

**Enzyme: ADH**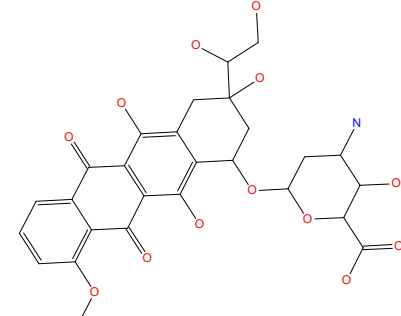

M80

0

**Enzyme: CYP450**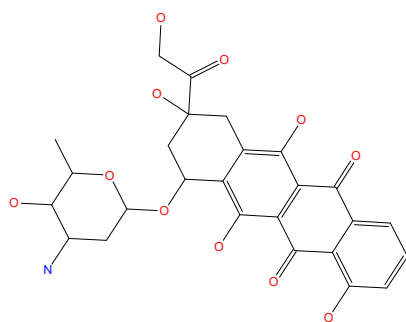

M6  
1

**Enzyme: ADH**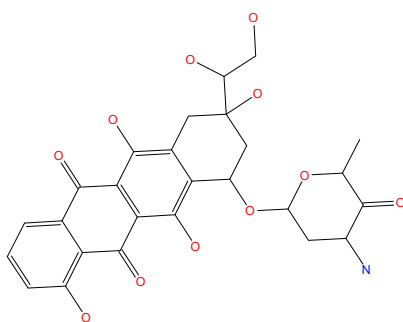

M57  
0

**Enzyme: ADH**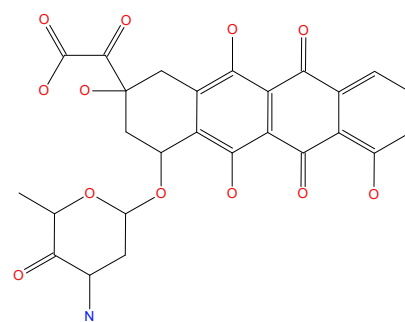

M58  
0

**Enzyme: ADH**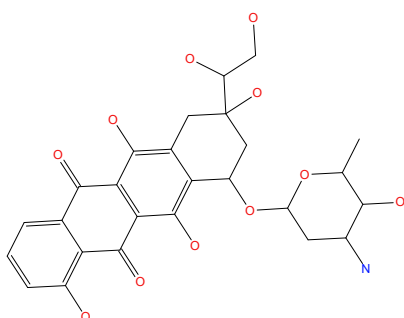

M32  
1

**Enzyme: ADH**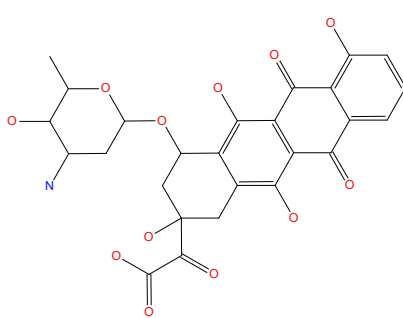

M33  
1

**Enzyme: ADH**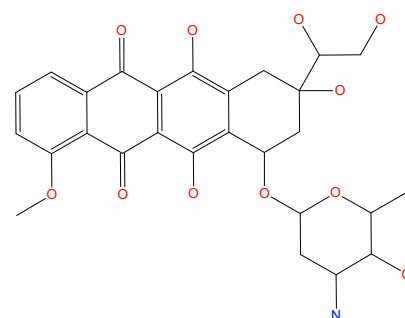

M7  
1

**Enzyme: ADH**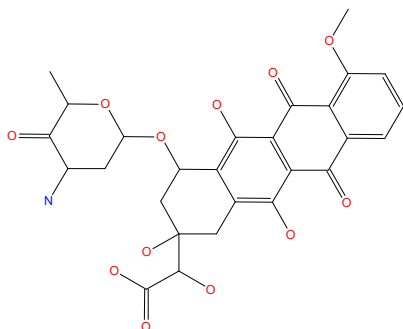

M65  
0

**Enzyme: ADH**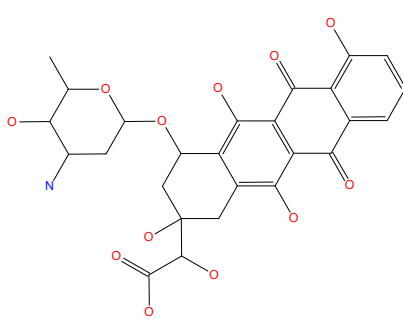

M86  
0

**Enzyme: ADH**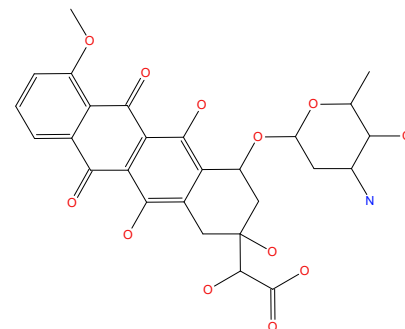

M39  
1

**Enzyme: CYP450**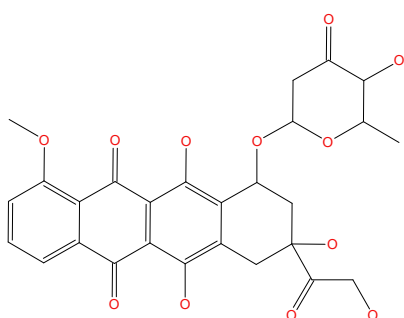

M9  
1

**Enzyme: ADH**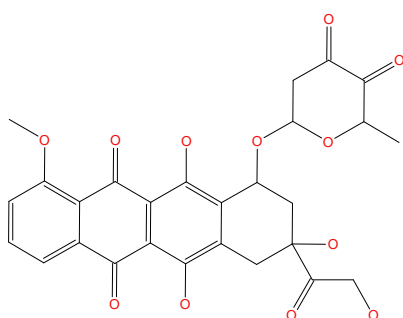

M18  
1

**Enzyme: CYP450**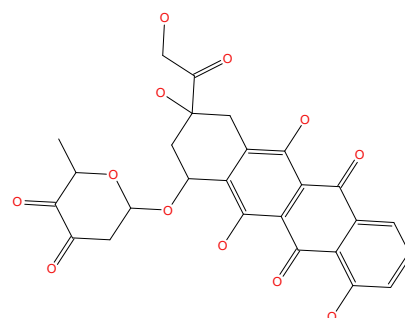

M59  
0

**Enzyme: ADH**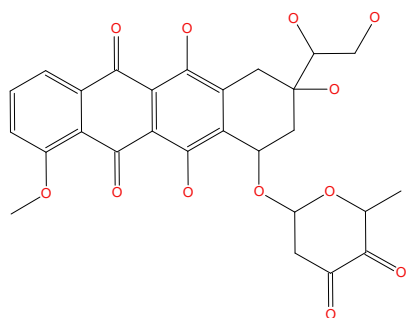

M66

0

**Enzyme: ADH**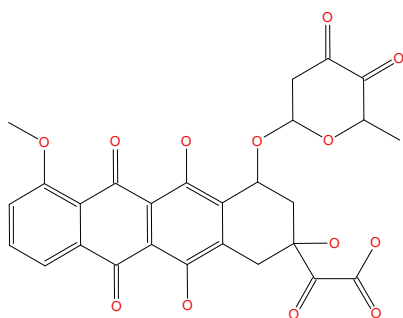

M72

0

**Enzyme: CYP450**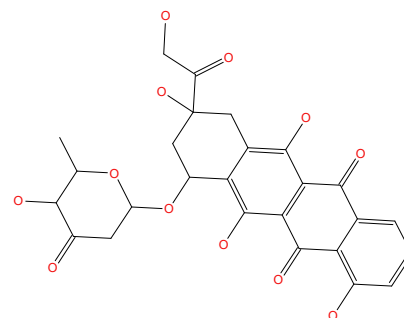

M34

1

**Enzyme: ADH**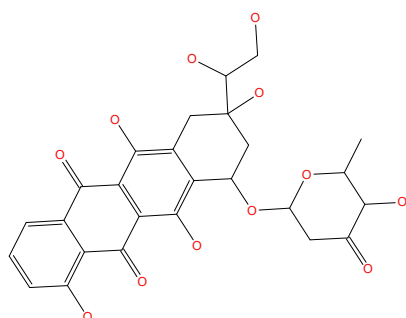

M87

0

**Enzyme: ADH**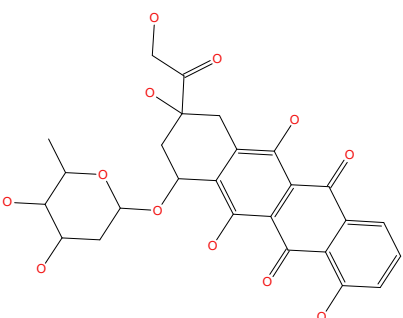

M109

0

**Enzyme: ADH**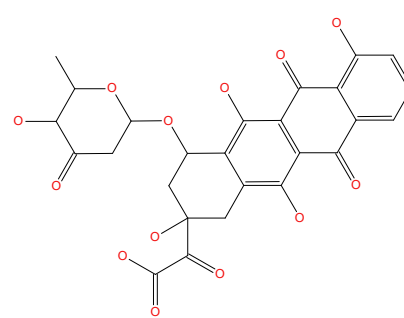

M93

0

**Enzyme: ADH**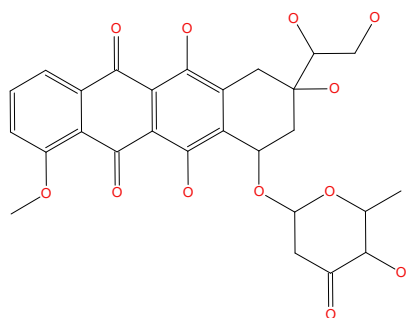

M40

1

**Enzyme: ADH**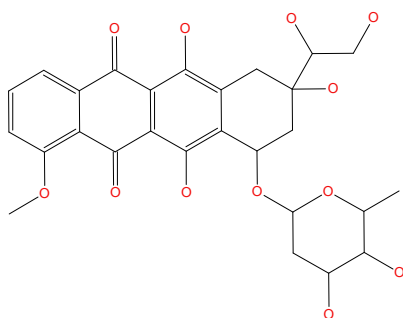

M114

0

**Enzyme: ADH**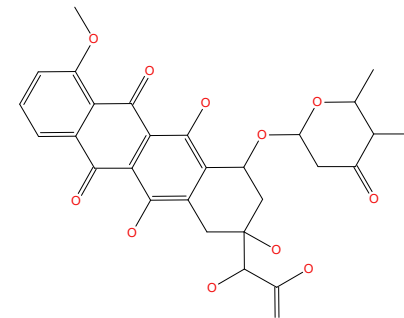

M99

0

**Enzyme: ADH**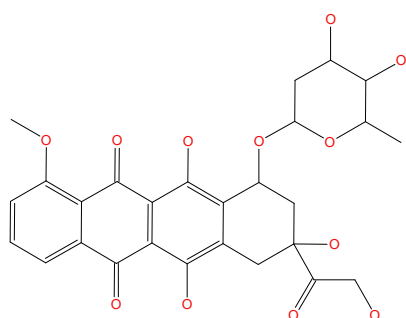

M50

1

**Enzyme: ADH**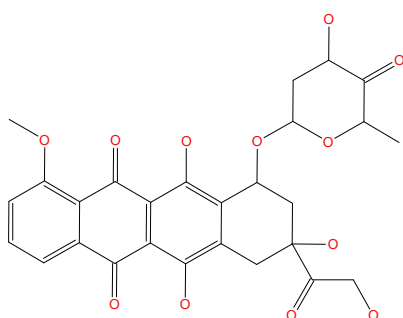

M124

0

**Enzyme: ADH**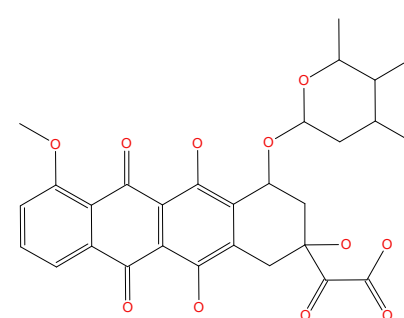

M120

0

**Enzyme: ADH**

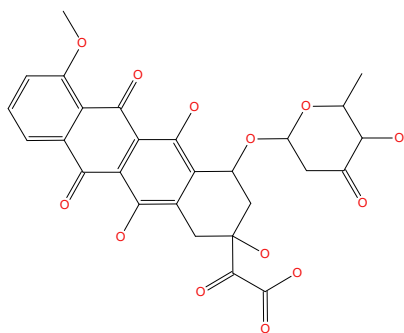

**M45**

**1**
